# Supplementary material for: Metabolic Responses to Waterlogging Differ between Roots and Shoots and Reflect Phloem Transport Alteration in Medicago truncatula
Source: PubMed Central journal article supplement (PMC7650564; doi:10.3390/plants9101373), 2020-10-15
Supplement: plants-09-01373-s001.pdf [file plants-09-01373-s001.pdf]

## Supplementary material

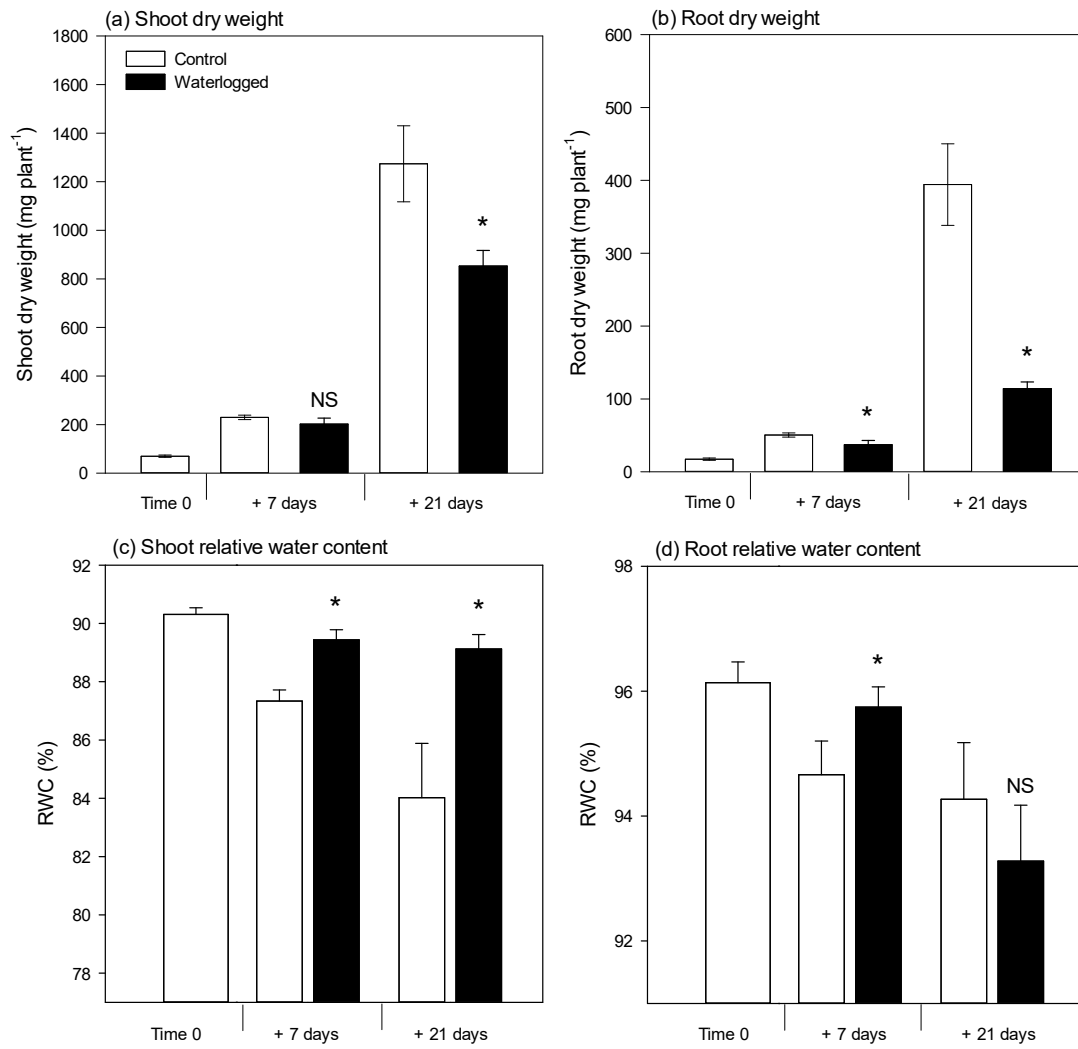

**Figure 1.** Plant biomass (a,b) and relative water content (c,d) seven and 21 days after the beginning of waterlogging. The zero-time point was just before the onset of waterlogging. Non-waterlogged plants (control plants) are shown with open bars, waterlogged plants with closed bars. Data are mean  $\pm$  SE ( $n = 6$ ). Asterisks stand for significance ( $p < 0.05$ , Tukey test) between control and waterlogging. NS, non significant.

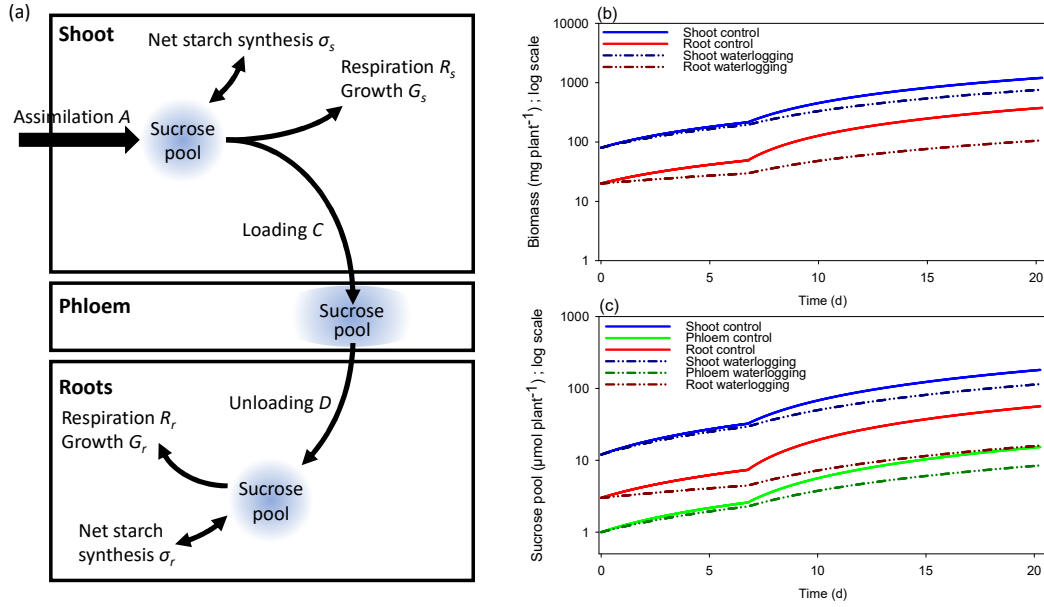

**Figure S2.** Model used to estimate the rate of phloem loading. (a) scheme depicting sucrose pools considered here. (b) modelled time course of biomass (shoots and roots). (c) modelled sucrose pools (total sucrose in the compartment of interest, in  $\mu\text{mol plant}^{-1}$ ). Total sucrose pools increase with time due to the general increase in plant size. See Notes S1 for further details on modelling. Note the use of the  $\log_{10}$  scale in (b) and (c).

### Notes S1. Description of the mass-balance calculation of phloem loading and imbalance

Carbon exchange between shoots and roots via the phloem is simplified using a three-compartment model (Fig. S2.a) where only sucrose is considered. By mass-balance, assimilated carbon is partitioned to net starch synthesis (positive when starch is synthesized; negative when it is degraded), respiration, growth and export (loading). Similarly, root imported carbon (unloading) is partitioned to respiration, growth and net starch synthesis. Growth was calculated using the biomass increment (Fig. S1) and expressed in sucrose equivalents using %C (Fig. 2). Respiration was estimated using the respiration rate measured in leaves (Fig. 1), converted to a dry mass basis and rescaled to the total biomass of the organ considered. Starch content was measured directly (Fig. 2). When rates are expressed in  $\mu\text{mol sucrose shoot}^{-1} \text{d}^{-1}$ , the mass-balance applied to the shoot sucrose total pool ( $S_s$ ) is so that:

$$\frac{dS_s}{dt} = A - R_s - G_s - \sigma_s - C \quad (1)$$

Since the total sucrose pool equals the average concentration ( $\omega_s$ ,  $\mu\text{moles per g DW}$ ) times biomass ( $B_s$ , in g DW), we have  $S_s = B_s \omega_s$ . Assuming that variations in  $\omega_s$  are small compared to biomass increase (i.e. the order of magnitude of sucrose concentration does not change dramatically), we have:

$$\frac{dS_s}{dt} \approx \omega_s \frac{dB_s}{dt} = \omega_s \xi G_s \quad (2)$$

where  $\xi$  is the conversion factor of growth ( $G_s$ ) from dry mass to  $\mu\text{moles sucrose}$  ( $0.00036 \text{ g DW } \mu\text{mol}^{-1} \text{ sucrose}$ ). Combining (1) and (2) gives:

$$C = A - R_s - G_s \cdot (1 + \xi \omega_s) - \sigma_s \quad (3)$$

Similarly, for roots, we obtain:

$$D = R_r + G_r \cdot (1 + \xi \omega_r) + \sigma_r \quad (4)$$

where  $\omega_r$  is sucrose concentration in roots.

The phloem imbalance (denoted as  $i$ ) is then given by the difference between loading and unloading,  $i = C - D$ . By definition, this imbalance represents the incremental change in total phloem sucrose pool ( $S_p$ , in  $\mu\text{mol}$  phloem sucrose  $\text{plant}^{-1}$ ) with time, that is:

$$\frac{dS_p}{dt} = i = C - D \quad (5)$$

When this difference is positive,  $S_p$  increases. This is the general case since the plant size increases and so must be total phloem volume. Nevertheless, since  $S_p = V_p \cdot \omega_p$  (where  $V_p$  is total phloem volume and  $\omega_p$  phloem sucrose concentration) and  $V_p$  is not readily accessible,  $S_p$  cannot be converted into a concentration. Computations indicate that  $S_p$  is within 1 and 10  $\mu\text{mol}$   $\text{plant}^{-1}$ . For example, if we assume that  $V_p$  is about 2.5% of total plant volume, it means an average concentration  $\omega_p$  of 40 mM (14 mg  $\text{mL}^{-1}$ ) in phloem sap, which is a realistic value. In Fig. 7, the imbalance was also expressed in percentage (denoted as  $p$ ) of sucrose loading as follows:

$$p = \frac{i}{C} \quad (6)$$
